1 **Endogenous auxin directs development of embryonic stem cells into**  
2 **somatic proembryos in Arabidopsis**

3  
4  
5 Omid Karami<sup>1</sup>, Cheryl Philipsen<sup>1,3</sup>, Arezoo Rahimi<sup>1</sup>, Annisa Ratna Nurillah<sup>1,4</sup>, Kim Boutilier<sup>2</sup>,  
6 and Remko Offringa<sup>1,\*</sup>

7  
8 <sup>1</sup>Plant Developmental Genetics, Institute of Biology Leiden, Leiden University, Sylviusweg 72, 2333 BE Leiden,  
9 Netherlands

10 <sup>2</sup>Bioscience, Wageningen University and Research, Droevendaalsesteeg 1, 6708 PB Wageningen, Netherlands

11  
12  
13  
14 **Short title:** Endogenous auxin in Arabidopsis somatic embryos

15  
16  
17 **One sentence summary:** Somatic embryogenesis in Arabidopsis requires auxin biosynthesis  
18 and polar auxin transport only after the acquisition of embryonic competence for somatic  
19 proembryo development and differentiation.

20  
21  
22  
23 **Author contribution:** O.K., K.B. and R.O. conceived the project and R.O. and K.B. obtained  
24 funding for the project, R.O. supervised the project, C.P. set up the 2,4-D-induced SE system  
25 and performed the initial experiments, O.K. performed most of the subsequent experiments,  
26 A.R. analyzed the expression of *YUCCA* genes in the AHL15-induced SE system. A.R.N.  
27 analyzed the effect of auxin biosynthesis inhibitors on both SE systems. O.K., K.B. and R.O.  
28 wrote the manuscript and all authors read, commented on and agreed with the manuscript.  
29 R.O. agrees to serve as the author responsible for contact and ensures communication.

30  
31 Funding information: O.K. was in part supported by subsidies from Generade and from the Building Blocks of  
32 Life research programme (no. 737.016.013, to R.O.), which is (partly) financed by the Dutch Research Council  
33 (NWO). C.P. was supported by an NWO-TTI-Green Genetics core project grant (NWO 828.11.004 to R.O.) which  
34 is (partly) financed by the Dutch Research Council (NWO).

35  
36 <sup>3</sup> Current affiliation: Plus Projects, Zwaardstraat 16, 2584 TX The Hague, Netherlands

37 <sup>4</sup> Current affiliation: BearingPoint Caribbean, Kaya Flamboyen 7, Willemstad, Curaçao, AN

38 \*Correspondence should be addressed to R.O. ([r.offringa@biology.leidenuniv.nl](mailto:r.offringa@biology.leidenuniv.nl))

39

40 **Abstract**

41

42 Somatic embryogenesis (SE) is the process by which embryos develop from *in vitro* cultured  
43 vegetative tissue explants. The synthetic auxin 2,4-dichlorophenoxyacetic acid (2,4-D) is  
44 widely used for SE induction, but SE can also be induced by overexpression of specific  
45 transcription factors, such as AT-HOOK MOTIF NUCLEAR LOCALIZED 15 (AHL15). 2,4-  
46 D and AHL15 both trigger the biosynthesis of the natural auxin indole-3-acetic acid (IAA).  
47 However, the role of this endogenously produced auxin in SE is yet not well understood. In this  
48 study we show that the induction of embryonic stem cells from explants does not require IAA  
49 biosynthesis, whereas an increase in IAA levels is essential to maintain embryo identity and for  
50 embryo formation from these stem cells. Further analysis showed that *YUCCA* (*YUC*) genes  
51 involved in the IPyA auxin biosynthesis pathway are up-regulated in embryo-forming tissues.  
52 Chemical inhibition of the IPyA pathway significantly reduced or completely inhibited the  
53 formation of somatic embryos in both 2,4-D-and AHL15-dependent systems. In the latter  
54 system, SE could be restored by exogenous IAA application, confirming that the biosynthesis-  
55 mediated increase in IAA levels is important. Our analyses also showed that PIN1 and AUX1  
56 are the major auxin carriers that determine respectively auxin efflux and influx during SE. This  
57 auxin transport machinery is required for the proper transition of embryonic cells to proembryos  
58 and, later, for correct cell fate specification and differentiation. Taken together, our results  
59 indicate that auxin biosynthesis in conjunction with its polar transport are required during SE  
60 for multicellular somatic proembryo development and differentiation.

61

62

63

64 **Keywords:** Somatic embryogenesis, Arabidopsis, 2,4-D, *AHL15*, *WOX2*, IPyA auxin

65 biosynthesis pathway, *YUCCA*, polar auxin transport, *PINI*, *AUX1*

66

67

## 68 Introduction

69

70 Plant growth and development is controlled to a large extent by plant growth regulators. The  
71 natural auxin, indole-3-acetic acid (IAA), is a major plant growth regulator, as it is involved in  
72 a wide array of physiological and developmental processes. An important factor determining  
73 the developmental role of auxin is its intracellular level, which is regulated by *de novo*  
74 biosynthesis, metabolism and transport. Together these three processes generate patterns of  
75 auxin maxima and minima in a cell type-dependent manner (Vanneste and Friml, 2009; Paque  
76 and Weijers, 2016).

77 The amino acid tryptophan (Trp) is the main precursor for IAA biosynthesis in plants. Recent  
78 genetic studies have uncovered several Trp-dependent IAA biosynthesis pathways (Tivendale  
79 et al., 2014; Zhao, 2018). Of these, the IPyA pathway has been well-characterized. The IPyA  
80 pathway consists of a two-step reaction. First, Trp is converted into indole-3-pyruvic acid  
81 (IPyA) by the TRYPTOPHAN AMINOTRANSFERASE OF ARABIDOPSIS1/TRYP-  
82 TOPHAN AMINOTRANSFERASE-RELATED (TAA1/TAR) family of aminotransferases  
83 (Stephanova et al., 2008). IPyA is subsequently converted into IAA by the enzymatic activity  
84 of the YUCCA (YUC) flavin-containing monooxygenases (Zhao et al., 2001). Expression of  
85 the bacterial tryptophan-2-monooxygenase (*iaaM*) auxin biosynthesis gene of under the control  
86 of a *YUC* promoter in *yuc* knock-out mutants (Cheng et al., 2006) or application of IAA (Chen  
87 et al., 2014) demonstrated the essential roles of the *YUC* genes in auxin biosynthesis in  
88 Arabidopsis. The IPyA pathway route is proposed as the main auxin biosynthesis route in  
89 Arabidopsis and has also been found in several other plant species, suggesting that it is a highly  
90 conserved IAA biosynthesis pathway in plants (Zhao, 2018).

91 Auxin is not produced in all plant cells, but is transported from source to sink tissues via the  
92 phloem or by polar cell-to-cell transport (Adamowski and Friml, 2015). This cell-to-cell  
93 transport of auxin is mainly mediated by plasma membrane-localized auxin efflux and influx  
94 carrier proteins. The PIN-FORMED (PIN) proteins have been identified as auxin efflux carriers  
95 that due to their asymmetric localization at the plasma membrane mediate unidirectional export  
96 of auxin from cells, thereby driving polar auxin transport (PAT) in plant tissues (Friml, 2010;  
97 Habets and Offringa, 2014). IAA can enter the cell by passive diffusion or through active import  
98 by influx carriers. The generally symmetrically localized AUXIN1/LIKE-AUX1 (AUX1/LAX)  
99 membrane proteins have been shown to act as permeases that mediate efficient auxin import  
100 (Péret et al., 2012; Swarup and Bhosale, 2019). AUX1/LAX-mediated IAA influx was shown  
101 to be 15 times more efficient than passive IAA diffusion and is therefore considered the  
102 predominant mode of auxin import in the cell (Swarup et al., 2005). The spatial localization  
103 pattern of PIN efflux carriers together with AUX1/LAX influx carriers determines the direction  
104 of auxin flow and differential accumulation of auxin in organs (Swarup and Bhosale, 2019).

105 The first phase of the plant life cycle starts with the fusion of the male and female gametes  
106 during fertilization to generate the zygote. This developmental switch, which is defined as  
107 gametophyte-to-zygotic transition, coincides with one of the most complex cellular  
108 reprogramming events, transforming the highly specialized, meiotically programmed egg cell  
109 into a totipotent mitotically active embryonic cell (She and Baroux, 2014). How the zygotic  
110 cell acquires totipotency remains largely unknown. During zygotic embryogenesis (ZE) the  
111 zygote gives rise to an embryo through cell division and morphogenesis. *De novo* auxin  
112 biosynthesis, auxin transport, and auxin signaling play critical roles in patterning and  
113 morphogenesis during ZE (Lau et al., 2012; Möller et al., 2017). The IPyA pathway regulates  
114 ZE by modulating spatiotemporal auxin production within embryonic tissues (Cheng et al.,  
115 2006; Stepanova et al., 2008). In Arabidopsis, the *YUC1*, *YUC4*, *YUC8*, *YUC9*, *YUC10*, *YUC11*  
116 genes are expressed in the 8- and 16-cell and globular embryo stages, and *yuc3 yuc9* and *yuc4*  
117 *yuc9* double and *yuc1 yuc4 yuc10 yuc11* quadruple mutants exhibit embryonic patterning  
118 defects (Cheng et al., 2006; Robert et al., 2013). Recently, it has been shown that maternally  
119 biosynthesized auxin in the fertilized ovules also provides a source of auxin for the early-stage  
120 ZE (Robert et al., 2018).

121 Asymmetric distribution of auxin by PIN carriers also has been shown to play a vital role in  
122 Arabidopsis embryo patterning: i.e. the apical-basal and radial embryo axis formation and the  
123 establishment of bilateral symmetry by cotyledon initiation (Friml et al., 2003; Weijers et al.,  
124 2005). In addition to the PIN carriers, two auxin influx carriers LAX1 and AUX1 also  
125 contribute to formation the auxin gradients and auxin flow direction during ZE (Ugartechea-  
126 Chirino et al., 2010; Robert et al., 2015). The stronger embryo defects observed after combining  
127 mutations in *PIN* and *AUX1/LAX* genes indicate a cooperative function between auxin efflux  
128 and efflux carriers in controlling embryo development (Robert et al., 2015).

129 The ability of a plant cell to acquire totipotency and enter the embryogenesis program is not  
130 restricted to the zygote, as embryos can also develop from somatic ovule cells or unreduced  
131 gametophytes without fertilization in apomictic plant species (Ozias-Akins, 2006; Hand and  
132 Koltunow, 2014). In many flowering plants, vegetative somatic cells can also be converted to  
133 embryonic cells under appropriate *in vitro* conditions, in a process called somatic  
134 embryogenesis (SE). Besides providing a powerful tool for applications in plant biotechnology  
135 and plant breeding, including genetic transformation, somatic hybridization, clonal propagation  
136 and synthetic seed production, SE offers the potential for understanding cellular and molecular  
137 mechanisms that occur during plant embryo initiation and subsequent morphogenesis (Leljak-  
138 Levanić et al., 2015; Guan et al., 2016). Given the importance of SE for plant breeding and  
139 propagation, many attempts have been made to understand the molecular basis of this  
140 phenomenon in different plant species. Some genes have been identified that encode  
141 transcription factors that promote SE. Ectopic expression of a single gene like *BABY BOOM*

142 (*BBM*), *LEAFY COTYLEDON 1 (LEC1)*, *LEC2*, *WUSCHEL (WUS)* or *AT-HOOK MOTIF*  
143 *NUCLEAR LOCALIZED 15 (AHL15)* induces spontaneous SE (Lotan et al., 1998; Stone et al.,  
144 2001; Boutilier et al., 2002; Zuo et al., 2002; Karami et al., 2021). SE can also be achieved by  
145 exogenous application of plant hormones. Recent research has provided new insights into the  
146 process of transcription factor- or hormone-induced SE (Horstman et al., 2017; Wójcik et al.,  
147 2020), but still the developmental, hormonal and molecular mechanisms governing SE are  
148 complex and far from understood.

149 Sixty-five percent of the recent SE protocols use the herbicide 2,4-dichlorophenoxyacetic acid  
150 (2,4-D), a synthetic analog of the natural auxin IAA, for SE induction (Wójcik et al., 2020).  
151 Although 2,4-D mimics IAA at the molecular level, 2,4-D is much more stable in plant cells  
152 than IAA (Eyer et al., 2016). Several studies have shown that 2,4-D or other exogenously-  
153 applied auxins significantly increase the level of IAA in the explants undergoing SE (Ivanova  
154 et al., 1994; Michalczyk and Druart, 1999; Jiménez and Bangerth, 2001a; Jiménez and  
155 Bangerth, 2001b; Cheng et al., 2016; Márquez-López et al., 2018; Vondrakova et al., 2018;  
156 Awada et al., 2019). IAA accumulation was also found in embryogenic tissues induced by  
157 *LEC2* overexpression in Arabidopsis seedlings (Stone et al., 2008). In Arabidopsis, 2,4-D  
158 induces expression of several *YUC* genes in IZE explants and embryogenic callus, and higher  
159 order *yuc* mutants produce fewer somatic embryos per explant compared to wild-type explants  
160 (Bai et al., 2013; Wójcikowska et al., 2013). In addition, ethylene has been reported to have a  
161 negative impact on SE in Arabidopsis by reducing *YUC* expression and thereby lowering the  
162 auxin levels in embryogenic callus (Bai et al., 2013). Therefore, IAA biosynthesis in embryonic  
163 cells seems to play a significant role in somatic embryo induction. However, the exact action  
164 of endogenous auxin in the early stage of somatic embryo induction has not been well  
165 characterized.

166 Here we use live-cell imaging and chemical biology approaches to reveal new insights into the  
167 contribution of endogenous auxin action in both 2,4-D and *AHL15* gene induced SE. Our data  
168 show that induction of embryonic stem cells from somatic explants does not require  
169 endogenous auxin biosynthesis, whereas an increase in endogenous auxin levels in conjunction  
170 with auxin transport is essential to maintain embryo identity and promote embryo  
171 differentiation.

172

## 173 Results

174

### 175 The *pWOX2:NLS-YFP* reporter distinguishes different stages of SE in Arabidopsis

176 Immature zygotic embryos (IZEs) from Arabidopsis are a much used experimental system to  
177 study SE induction in response to 2,4-D (Gaj, 2001). In our hands, embryonic callus can be  
178 efficiently induced on cotyledons of IZEs incubated for seven to nine days of culture on medium  
179 supplemented with 4.5  $\mu$ M 2,4-D. Following transfer of the explants to 2,4-D free medium, this  
180 embryonic callus develops into globular and further into cotyledon-stage somatic embryos  
181 (Ikeda-Iwai, 2002; Gaj, 2011). Recently, we showed that overexpression of the *AHL15* gene  
182 also induces SE on cotyledon tissue of IZEs in the absence of 2,4-D (Karami et al., 2021). In  
183 *p35S:AHL15* cotyledons, the protodermal cells at the adaxial side are converted into embryonic  
184 callus around six days after culture. Approximately two days later these embryonic cells  
185 develop into globular shaped pro-embryos.

186 Here we used the *pWOX2:NLS-YFP* reporter (Breuninger et al., 2008) for time-lapse imaging  
187 of embryo initiation during 2,4-D- and *AHL15*-induced SE. *WOX2* is a member of the  
188 *WUSCHEL* (*WUS*) homeodomain gene family and the reporter is expressed in the Arabidopsis  
189 zygote, the suspensor and the early zygotic embryo (Supplemental Figure 1A). In our 2,4-D-  
190 based SE system, expression of the *pWOX2:NLS-YFP* reporter was not detectable in IZE  
191 cotyledons within the first five days of IZE culture (Supplemental Figure 1B). Relatively weak  
192 *pWOX2:NLS-YFP* activity was first detected in the adaxial regions of cotyledons after six to  
193 seven days. One to two days later, this signal increased in the areas that formed embryogenic  
194 protrusions (Supplemental Figure 1B). No *pWOX2:NLS-YFP* activity was detected in wild-type  
195 IZE cotyledons cultured in the absence of 2,4-D (Supplemental Figure 1B). Also in  
196 *p35S:AHL15* IZEs, the *pWOX2:NLS-YFP* signal was not detected in the cotyledons of  
197 *p35S:AHL15* explants within the first four days of culture (Supplemental Figure 2A). After 5  
198 to 6 days, a relatively weak *pWOX2:NLS-YFP* signal was observed in epidermal cells at the  
199 adaxial side of *p35S:AHL15* IZE cotyledons, just like with the 2,4-D system (Supplemental  
200 Figure 2B). One to two days later, *pWOX2:NLS-YFP* expression significantly increased  
201 (Supplemental Figure 2C), followed by a reduction in expression in developing globular  
202 embryos on day nine to 11 (Supplemental Figure 2D,E). Thus *pWOX2:NLS-YFP* is not  
203 expressed in cotyledon somatic cells within the first four days of culture, but is induced later,  
204 becomes highly expressed in dividing embryonic clusters and is then down-regulated from the  
205 globular stage onward (Supplemental Figure 1C). The results indicate that *WOX2* is a good  
206 marker for both our 2,4-D- and *AHL15*-induced SE systems to identify cell fate transitions to  
207 embryo development and for marking the developmental stages of SE.

208 Based on these observations, we defined three distinct developmental stages during the early  
209 process of SE induction from Arabidopsis IZEs: 1) acquisition of embryogenic competence in

210 somatic cells around day 6, 2) rapid cell proliferation coinciding with the conversion of  
211 competent somatic cells into embryonic stem cells around day 8 and 3) the development of  
212 embryonic cells into globular pro-embryos around day 10 of culture ([Supplemental Figure 1C](#)).

213

#### 214 **The IPyA auxin biosynthesis pathway is essential for 2,4-D-induced SE**

215 The YUC flavin monooxygenases catalyze the rate-limiting step in the main auxin biosynthesis  
216 pathway in plants (Zhao, 2018). Previous studies have shown that the *YUC1*, *YUC2*, *YUC4*,  
217 *YUC6*, *YUC10*, *YUC11* genes are expressed at the sites of embryo formation during 2,4-D-  
218 induced somatic embryogenesis in Arabidopsis, suggesting that they are responsible for  
219 increased IAA biosynthesis in these embryogenic cells (Bai et al., 2013; Wickramasuriya and  
220 Dunwell, 2015). However, how an increase in IAA biosynthesis affects the progression of 2,4-  
221 D-induced SE is not clear. To determine the role of endogenous IAA biosynthesis in 2,4-D-  
222 induced SE, we first re-analyzed the activity of several *pYUC:GFP-GUS* reporters in IZE  
223 explants on days 0, 3, 5 and 7 of culture in medium supplemented with 2,4-D ([Supplemental](#)  
224 [Figure 3](#)). The *pYUC2/10:GFP-GUS* reporters were not or only barely expressed at any time  
225 point in culture (not shown), but dynamic expression patterns were observed for the  
226 *pYUC4/5/6/7/8/9/11:GFP-GUS* reporters ([Supplemental Figure 3](#)). The reporters for  
227 *YUC6/7/8/9* were strongly expressed in cotyledon tissue in seven-day-old IZE explants cultured  
228 on 2,4-D medium, whereas they barely showed expression in seedlings-derived from IZE  
229 explants that were cultured on medium lacking 2,4-D ([Figure 1A](#)). These *YUC* genes might be  
230 responsible for the increase in the auxin biosynthesis in embryogenic tissues induced on  
231 cotyledons.

232 To confirm the role of IPyA pathway-mediated auxin biosynthesis in 2,4-D-induced SE and in  
233 view of the strong redundancy between *YUC* genes during ZE and SE (Cheng et al., 2007; Bai  
234 et al., 2013; Robert et al., 2013). we used yucasin (*yuc*), a specific inhibitor of YUC enzyme  
235 activity (Nishimura et al., 2014), to reduce IAA levels during embryogenic callus induction by  
236 2,4-D. Treatment with 50  $\mu$ M or higher concentrations of *yuc* resulted in a significant reduction  
237 in the number of somatic embryos ([Figure 1B](#)). We propose that the lack of a significant effect  
238 of lower *yuc* concentrations (10 and 20  $\mu$ M, [Figure 1B](#)) is due to the higher auxin level that is  
239 already present in 2,4-D-induced explants.

240 Unexpectedly, we observed *pWOX2:NLS-YFP* expression in both untreated and *yuc*-treated  
241 cotyledons starting from six to seven-day-old 2,4-D-treated IZE explants ([Figure 1C](#)).  
242 However, whereas *pWOX2:NLS-YFP* expression increased in untreated explants one to two  
243 days later, it decreased in cotyledons of *yuc*-treated explants ([Figure 1C](#)). These results indicate  
244 that endogenous auxin is not required for the initiation of SE, but rather for the maintenance of  
245 embryonic cell identity in 2,4-D-induced SE.

246

247 **Auxin biosynthesis by the IPyA pathway is also essential for *AHL15*-induced SE**

248 Next we studied the role of auxin biosynthesis in *AHL15*-induced SE. As gene-induced SE  
249 occurs in the absence of exogenous 2,4-D, this allowed us to follow the spatiotemporal  
250 endogenous auxin dynamics in *p35S:AHL15* cotyledon tissues using the auxin responsive  
251 *pDR5:GFP* reporter (Benkova et al., 2003). Time-lapse analysis showed that *pDR5:GFP*  
252 activity was not different in wild-type and *p35S:AHL15* cotyledons during the first three days  
253 of culture (Figure 2A). One to two days later, however, reporter expression markedly increased  
254 throughout the entire *p35S:AHL15* cotyledons, while no or a much lower GFP signal was  
255 observed in wild-type explants (Figure 2A). These results suggested an increase in auxin levels  
256 in *p35S:AHL15* cotyledons.

257 Comparison of the expression of *pYUC:GFP-GUS* and *pYUC:NLS-3xGFP* reporters in  
258 *p35S:AHL15* or wild-type IZE cultures at five and seven days of cultures did not detect obvious  
259 differences in activity of the *YUC1/2/3/4/5/10/11* promoters (not shown), indicating that the  
260 increase in *pDR5* expression in *p35S:AHL15* cotyledons is not likely to be mediated by these  
261 *YUC* genes. At the same time points the *pYUC7/8/9* promoters did show higher activity in  
262 *p35S:AHL15* compared to wild-type explant cotyledons (Figure 2B). Interestingly, in five-day-  
263 old IZE explants, *pYUC6:GFP-GUS* expression was not detected in *35S:AHL15* cotyledons,  
264 whereas it was expressed in wild-type explants (Figure 2B). After 7 days of culture, however,  
265 expression of this reporter was strongly upregulated in *p35S:AHL15* cotyledons (Figure 2B),  
266 whereas it was reduced in wild-type cotyledons. These results suggested that the increase in  
267 *pDR5* expression in *p35S:AHL15* cotyledons is caused by the induction of *YUC6/7/8/9* gene  
268 expression.

269 We did not detect a significantly higher level of *pDR5:GFP* activity or *pYUC6/7/8/9* reporter  
270 expression in hypocotyl or root tissues of *p35S:AHL15* compared to wild-type explants (not  
271 shown). This implies that *YUC6/7/8/9* genes are specifically upregulated in cotyledon tissues,  
272 causing a cotyledon-specific increase in auxin response in *p35S:AHL15* explants. The  
273 simultaneous induction of *pWOX2:NLS-GFP* reporter expression in *p35S:AHL15* explant  
274 cotyledons (Figure 3A) suggested that the enhanced auxin biosynthesis and response is  
275 associated with either the cell fate change or the acquisition of embryo identity in cotyledons  
276 tissues.

277 Treatment with the *yuc* auxin biosynthesis inhibitor or with L-kynurenine (kyn), which  
278 specifically blocks the tryptophan aminotransferase TAA1/TAR enzymes of the IPyA pathway  
279 (He et al., 2011), completely inhibited somatic embryo induction in *p35S:AHL15* IZE explants.  
280 Inhibition occurred at relatively low (20  $\mu$ M) *yuc* or kyn concentrations (Figure 2C and D),  
281 compared to 2,4-D-induced SE, and could be rescued by exogenous application of 12 to 500  
282 nM IAA, concentrations that did not inhibit SE in the absence of *yuc* or kyn (Figure 2E and F).  
283 These results, together with the observed induction of *YUC6/7/8/9* gene expression, suggest



284 that the IPyA pathway-mediated IAA biosynthesis is required for *AHL15*-induced SE. The  
285 rescue of *yuc*- or *kyn*-inhibited SE by exogenous application of relatively low auxin  
286 concentrations (Figure 2F) suggests that *AHL15*-induced SE is hypersensitive to changes in  
287 auxin levels, implying that a relatively small increase in auxin levels is sufficient for *AHL15*-  
288 induced SE.

289 Expression of the *pWOX2:NLS-YFP* reporter was detected in the cotyledons of both five to six-  
290 day-old untreated and *yuc*-treated *p35S::AHL15* IZE explants (Figure 3A). However, one to  
291 two days later, when *pWOX2:NLS-YFP* expression increased in the untreated control,  
292 *pWOX2:NLS-YFP* expression decreased or disappeared in cotyledons of *yuc*-treated  
293 *p35S::AHL15* IZEs (Figure 3A). These results indicate that the cotyledon cells in *yuc*-treated  
294 *p35S::AHL15* IZE explants initially acquire embryo identity, but that these freshly induced-  
295 embryonic cells are not stable and quickly return to the non-embryogenic state in the absence  
296 of auxin biosynthesis. This was also observed for 2,4-D-induced SE and implies that  
297 endogenous auxin production mediated by the IPyA pathway is not required for the acquisition  
298 of embryo identity, but that it mainly contributes to the maintenance of embryonic identity and  
299 for embryo development.

300 We previously reported that *AHL15* is highly expressed in 2,4-D-induced embryogenic tissues  
301 and that expression of a *pAHL15:AHL15-GUS* fusion in the *ahl15/+* heterozygous or *ahl15*  
302 homozygous mutant background respectively inhibits 2,4-D-induced SE or arrests zygotic  
303 embryogenesis. Expression of the *AHL15-GUS* fusion in these mutant backgrounds leads to a  
304 dominant-negative effect that overcomes the functional redundancy between *AHL15* and other  
305 *AHL* family members, and thus leads to *ahl* loss-of-function (Karami et al., 2021). The  
306 expression of *YUC6/7/8/9* was significantly reduced in cotyledons of 2,4-D-treated *ahl15/+*  
307 *pAHL15:AHL15-GUS* IZEs compared to wild-type IZEs (Figure 3B), suggesting that these  
308 *YUC* genes may act downstream of *AHL15* during 2,4-D-induced SE. The significantly lower  
309 expression of the *pDR5:GFP* reporter in *ahl15 pAHL15:AHL15-GUS* zygotic embryos  
310 (Supplemental Figure 4B) compared to wild-type embryos (Supplemental Figure 4A) suggests  
311 that *AHL* genes also play a role in stimulating IAA biosynthesis in zygotic embryos, possibly  
312 through induction of *YUC* gene expression.

313

### 314 **Auxin efflux is not required for SE initiation but for proper embryo patterning**

315 Auxin efflux carriers play an important role in zygotic embryo patterning, but not in the  
316 initiation of ZE (Friml et al., 2003). In our hands, 2,4-D-induced SE is a clear two-step process,  
317 involving 1) induction of embryonic callus on the IZE explant cotyledons after about ten days  
318 of culture on 2,4-D containing medium, and 2) patterning of this embryonic callus into somatic  
319 embryos after explant transfer to 2,4-D free medium. Obviously, the patterning process is  
320 inhibited by the presence of exogenous 2,4-D. To determine at which stage of SE auxin efflux

321 is important, we analyzed the effect of the auxin efflux inhibitor N-1-naphthylphthalamic acid  
322 (NPA) on these two steps of 2,4-D-induced SE. Our experiments showed that the number of  
323 somatic embryos is only slightly decreased following treatment with different concentrations  
324 of NPA during the first step (initiation) of 2,4-D-induced SE (Figure 4A and B). By contrast,  
325 NPA treatment led to aberrant embryo-like structures (Figure 4A) and strongly reduced the  
326 number of normal, non-fused somatic embryos produced when applied during the second  
327 (patterning) step of 2,4-D-induced SE (Figure 4C). As we cannot exclude that the slight effect  
328 of NPA treatment during the first step is caused by NPA accumulation persisting during the  
329 second step, we conclude that auxin efflux plays no or only a minor role in the initiation of SE,  
330 but that like in ZE it has a major role later in embryo patterning and development.

331 As *AHL15*-induced SE occurs in the absence of exogenous 2,4-D, the patterning process is not  
332 inhibited, and embryo initiation and patterning occur more simultaneous compared to 2,4-D-  
333 induced SE. Therefore, the effect of NPA on *AHL15*-induced SE was only tested from the start  
334 of *p35S:AHL15* IZE culture. NPA-treated *p35S:AHL15* IZEs only developed a few aberrant  
335 embryos with fused cotyledons (Figure 4D), whereas many somatic embryos (around ten to  
336 twenty per explant) were formed without NPA treatment (Figure 4D). This result reveals that  
337 auxin efflux is required for the efficient production and the proper development of somatic  
338 embryos during *AHL15*-induced SE.

339 Expression of the *pWOX2:NLS-YFP* embryo identity reporter in *p35S:AHL15* IZE cotyledons  
340 after 7 days of culture was similar in the presence or absence of NPA (Figure 4E). Without  
341 NPA, we observed the usual reduction in *pWOX2:NLS-YFP* expression during further  
342 patterning and development of somatic embryos after 9 and 12 days of culture (Figure 4E). In  
343 the presence of NPA, however, we did not observe this reduction in *pWOX2:NLS-YFP*  
344 expression (Figure 4E). High expression of *pWOX2:NLS-YFP* persisted until day 12 in NPA  
345 cultured *AHL15*-induced somatic embryos, which might reflect the maintenance of early  
346 embryo identity and inhibition of subsequent embryo patterning and development, probably  
347 caused by intracellular auxin accumulation due to lack of efflux, similar to what is observed for  
348 the 2,4-D-cultured embryonic calli. Taken together these data indicate that in both 2,4-D- and  
349 *AHL15*-induced SE, the early events, i.e. acquisition and maintenance of embryonic identity  
350 and the induction of embryonic cells, require high intracellular auxin and can proceed  
351 independently of auxin efflux, while the subsequent embryo patterning and development relies  
352 on auxin efflux to reduce the intracellular auxin concentration allowing loss of embryo identity.  
353 Polarly localized PIN proteins on the plasma membrane are known to be key components  
354 driving auxin efflux-mediated patterning during zygotic embryogenesis (Friml et al., 2003).  
355 Therefore, we examined the expression of *pPIN1:PIN1-GFP*, *pPIN2:PIN2-VENUS*,  
356 *pPIN4:PIN4-GFP*, and *pPIN7:PIN7-GFP* reporters during SE. Of these reporters, only PIN1-  
357 GFP expression was observed in *35S:AHL15* (Figure 5A) or 2,4-D-cultured IZE cotyledons

358 (Figure 5B). The earliest PIN1-GFP signals were detected after seven to eight days of culture  
359 at the abaxial side of the cotyledons (Figure 5A and B). These results indicate that PIN1 is the  
360 major regulator of auxin efflux during AHL15 and 2,4-D-induced SE.

361 To further monitor PIN1 activity during SE, co-expression of *pWOX2:NLS-YFP* and  
362 *pPIN1:PIN1-GFP* were tracked in the *AHL15*- and 2,4-D-induced SE systems. Time-lapse  
363 experiments showed that *pPIN1:PIN1-GFP* is not expressed when the first *pWOX2:NLS-YFP*  
364 activity appears in the AHL15- and 2,4-D-induced SE systems (Figure 5C and D). However,  
365 one to two days later, clear *pWOX2:NLS-YFP* and *pPIN1:PIN1-GFP* co-expression was  
366 detected in both systems (Figure 5C and D). During somatic embryo development,  
367 *pPIN1:PIN1-GFP* expression was maintained in the embryo, but *pWOX2:NLS-YFP*  
368 disappeared (Figure 5E). These results suggest that induction of embryonic cell identity is  
369 independent of PIN1 function, but that PIN1 promotes the development of embryonic cells  
370 toward multicellular embryos.

371

### 372 **Auxin influx is required for embryonic cell identity maintenance during SE**

373 Auxin influx carriers facilitate the import of auxin into plant cells and thereby play a critical  
374 role in the directional auxin flow and the resulting auxin maxima and minima formed during  
375 ZE (Ugartechea-Chirino et al., 2010; Robert et al., 2015; Boot et al., 2016). When the auxin  
376 influx inhibitor 1-naphthoxyacetic acid (1-NOA) (Parry et al., 2001) was applied during the  
377 first step (initiation) of 2,4-D-induced SE, it strongly reduced the number of embryos formed  
378 on cotyledons (Figure 6A), suggesting that auxin influx is essential for this phase of SE. As  
379 with *yuc* treatment, AHL15-induced SE was significantly more sensitive to 1-NOA treatment.  
380 30  $\mu$ M 1-NOA completely blocked the induction of embryos on cotyledons of *p35S:AHL15*  
381 IZEs (Figure 6B), whereas this was not the case for 2,4-D-induced SE. To further explore  
382 whether impaired auxin influx affects the initiation or maintenance of embryonic cell identity  
383 during SE, *pWOX2:NLS-YFP* expression was tracked in 1-NOA-treated IZE explants.  
384 *pWOX2:NLS-YFP* expression was initially detected after six to seven days of culture in  
385 *35S:AHL15* (Figure 6C) and 2,4-D treated IZE cotyledons (Figure 6D) in the presence or absence  
386 of 1-NOA. One to two days later, however, the *pWOX2:NLS-YFP* signals were highly reduced  
387 in cotyledons of 1-NOA-treated IZEs compared with mock-treated IZEs (Figure 6C and D).  
388 These results suggest that auxin influx is required for embryonic identity maintenance, just like  
389 auxin biosynthesis by the IPyA pathway. The negative effect of the *yuc* auxin biosynthesis  
390 inhibitor on *p35S:AHL15* IZEs could be complemented by providing exogenous IAA (Figure  
391 2F). However, co-treatment of *p35S:AHL15* IZEs with 30  $\mu$ M 1-NOA, 20  $\mu$ M *yuc*, and 100  
392 nM IAA disrupted this IAA-mediated complementation (Supplemental Figure 5), confirming  
393 that embryonic cell identity maintenance relies on elevated intracellular IAA levels mediated  
394 by both auxin biosynthesis and auxin influx. Analysis of *pAUX1:AUX1-GFP* and

395 *pLAX1:LAX1-GFP* cultured IZEs showed that *LAX1* is not expressed during *AHL15* or 2,4-D  
396 induced SE (not shown), but that *AUX1-GFP* signals coincide with the appearance of  
397 *pWOX2:NLS-YFP* marked embryonic cells in cotyledons at day six to eight and are also present  
398 in globular embryos at day 10 (Figure 6E and F). These results suggest that *AUX1* mediates  
399 auxin uptake during SE. The *AUX1-GFP* signals appear at the same time as the *PIN1-GFP*  
400 signals, suggesting that auxin influx and efflux balance the auxin levels in cells and thereby  
401 determine whether embryonic cell identity is maintained or that patterning and development  
402 are initiated.  
403

## 404 **Discussion**

405

406 SE is a unique biological process in which differentiated somatic cells acquire embryo identity  
407 and develop into embryos. The mechanisms driving acquisition of embryo cell fate in somatic  
408 cells is a fundamental question in plant biology. Although recent work has shown that SE  
409 involves a complex signaling network and large-scale transcriptional reprogramming, the  
410 molecular mechanisms underlying SE are not well understood. Given that an increase in  
411 endogenous auxin levels is an important factor for efficient SE (Ivanova et al., 1994;  
412 Michalczuk and Druart, 1999; Jiménez and Bangerth, 2001a; Jiménez and Bangerth, 2001b;  
413 Cheng et al., 2016; Márquez-López et al., 2018; Vondrakova et al., 2018; Awada et al., 2019),  
414 we investigated when and how endogenous auxin promotes SE using two SE systems, 2,4-D-  
415 and transcription factor (AHL15)-induced SE on Arabidopsis IZE explants.

416

### 417 **Auxin biosynthesis is required to maintain embryo identity during SE**

418 *De novo* IAA biosynthesis in plant tissues has a large influence on plant growth and  
419 development and is essential for proper ZE (Robert et al., 2013; Zhao, 2018). Also for 2,4-D-  
420 induced SE, a significant increase in endogenous IAA levels has been reported in various plants  
421 species for embryogenic explants compared to non-embryogenic explants (Ivanova et al., 1994;  
422 Michalczuk and Druart, 1999; Jiménez and Bangerth, 2001a; Jiménez and Bangerth, 2001b;  
423 Cheng et al., 2016; Márquez-López et al., 2018; Vondrakova et al., 2018; Awada et al., 2019).  
424 This increase in endogenous IAA levels is thought to be required for SE, and to be mediated by  
425 upregulation of the IPyA auxin biosynthesis route.

426 The rate limiting step in the IPyA pathway is catalyzed by the YUC flavin monooxygenases.  
427 The Arabidopsis genome encodes 11 *YUC* genes, and based on the up-regulation of  
428 *YUC1/2/4/6/10/11* genes in Arabidopsis embryogenic tissue induced by 2,4-D and a reduced  
429 somatic embryo induction in *yuc11* single, *yuc2/4* double and *yuc1/4/10* triple mutants (Bai et  
430 al., 2013), it has been suggested that the corresponding genes mediate the increase in the IAA  
431 levels required for 2,4-D-induced SE (Wójcikowska et al., 2013). In our 2,4-D-induced SE  
432 system *YUC4/6/11* were also upregulated together with *YUC7/8/9*, three *YUC* genes that had  
433 not been identified in previous publications Application of the IAA biosynthesis inhibitor *yuc*  
434 (Nishimura et al., 2014) significantly reduced the number of 2,4-D-induced somatic embryos.  
435 *YUC6/7/8/9* gene expression was also found to be upregulated in somatic embryo-forming  
436 cotyledons of cultured *p35S:AHL15* IZEs, and application of the *yuc* or *kyn* IAA biosynthesis  
437 inhibitors severely impaired AHL15-induced SE, while exogenous IAA application alleviated  
438 the repression of SE caused by *yuc* and *kyn*. Based on our data and given the well-established  
439 correlation between the expression of *YUC* genes and IAA levels (Kim et al., 2011; Hentrich et  
440 al., 2013), we conclude that the elevated *YUC6/7/8/9* expression levels in cotyledons of cultured

441 2,4-D-treated or *35S: AHL15* IZEs results in increased IAA levels, which are crucial for the  
442 development of somatic embryos on these tissues.

443 Recently, we showed that up-regulation of *AHL* gene expression is required for 2,4-D-induced  
444 SE (Karami et al., 2021). Here we show that the expression of the *YUC6/7/8/9* genes is not up-  
445 regulated in response to 2,4-D in the *ahl* loss-of-function mutant background. Therefore, *AHL*  
446 genes probably act downstream of 2,4-D and upstream of *YUC*-mediated auxin biosynthesis.  
447 Although expression of the auxin response *pDR5:GFP* reporter is clearly reduced in *ahl* loss-  
448 of-function mutant zygotic embryos (Supplemental Figure 4B), it remains to be determined  
449 whether *AHL* genes also have a role in triggering auxin biosynthesis in zygotic embryos.

450 Our results show that *pWOX2:NLS-YFP* expression marks three different stages of SE in IZE  
451 cotyledon tissues: i) the acquisition of embryonic competence marked by low *pWOX2:NLS-*  
452 *YFP* expression, ii) the formation of somatic proembryos consisting of embryonic stem cells  
453 showing high *pWOX2:NLS-YFP* expression, and iii) the development of these proembryos into  
454 globular and heart shaped embryos, coinciding with loss of *pWOX2:NLS-YFP* expression  
455 (Figure 7; Supplemental Figure 1C). By tracking the activity of this reporter in 2,4-D treated or  
456 *p35S:AHL15* cotyledon cells, we showed that induction of embryo identity in cotyledon cells  
457 does not require auxin biosynthesis, as it occurs in the presence of the *yuc* inhibitor, but that  
458 under these conditions embryo identity is not maintained resulting in rapid conversion to non-  
459 embryonic cells. Therefore, we propose that acquisition of embryonic identity in these  
460 cotyledons does not require an increase in IAA levels, but that the maintenance of embryonic  
461 identity and progression of embryogenesis requires elevated IAA levels. This is in line with the  
462 critical role of auxin biosynthesis in the first steps of zygotic embryo patterning and  
463 development (Cheng et al., 2006; Robert et al., 2013).

464 This conclusion immediately triggers two questions. If endogenous auxin is not involved in the  
465 acquisition of embryonic competence, how can this be triggered by the auxin analog 2,4-D?  
466 And why is 2,4-D itself incapable of maintaining embryonic cell identity? The answer to the  
467 first question might be that acquisition of embryonic competence requires reprogramming by  
468 strong chromatin remodelling (Wang et al., 2020; Karami et al., 2021), something that can only  
469 be achieved by transcription factor overexpression or by non-physiological auxin levels. For  
470 the second question, the low efficiency of polar cell-to-cell transport of 2,4-D compared to IAA  
471 and the specific interaction of 2,4-D with the auxin signaling machinery (Ma et al., 2018) might  
472 provide possible explanations. It is well documented that high mitotic activity is necessary for  
473 the maintenance of human embryonic stem cell identity (Chen et al., 2015). Consistent with the  
474 remarkable similarity in the organization and behavior of stem cells between plants and animals  
475 (Heidstra and Sabatini, 2014), high mitotic activity could be essential for the maintenance of  
476 the plant embryonic stem cells. Elevated levels of IAA in root and shoot meristems are known  
477 to play an important role in stem cell maintenance potentially through promoting cell

478 proliferation (Takatsuka and Umeda, 2014). Therefore, we hypothesize that high IAA levels in  
479 embryonic cells might be required to promote cell proliferation.

480

481 **Auxin influx and efflux are required for maintaining embryonic cell identity and for**  
482 **embryo development**

483 The directional transport of auxin, facilitated by both influx and efflux carriers, generates and  
484 maintains auxin gradients in tissues, and is known to play a crucial role in establishment of the  
485 embryonic axis and the development of the zygotic embryo (Möller and Weijers, 2009;  
486 Adamowski and Friml, 2015). In contrast, the function of auxin efflux and influx in SE remains  
487 largely unknown. In this study, we showed that the auxin influx and efflux machinery plays an  
488 important role in the maintenance of embryonic cell identity and proper development of SE. By  
489 using the auxin efflux inhibitor NPA or the auxin influx inhibitor 1-NOA, and by tracking  
490 expression of the *pWOX2:NLS-YFP* reporter, we found that the early steps in SE, including  
491 acquisition of embryonic identity and induction embryonic stem cells do not depend on  
492 directional auxin transport. We observed that NPA disrupts the transformation of embryogenic  
493 cells into differentiated embryos. In contrast to the normal downregulation of *pWOX2:NLS-*  
494 *YFP* after the globular stage of somatic embryo development, *pWOX2:NLS-YFP* activity was  
495 maintained in somatic embryos on NPA-containing medium. From this data we conclude that  
496 auxin efflux promotes the development embryonic cell clusters to somatic embryos and later  
497 regulates cell fate specification and differentiation during further embryo development.

498 Among the PIN1-type proteins (PIN1/2/3/4/7) that facilitate auxin efflux in Arabidopsis  
499 (Adamowski and Friml, 2015), we only detected expression of PIN1 in embryonic cells and  
500 later during embryo development. Previous studies have demonstrated that elevated auxin  
501 levels activate the expression of PIN1 proteins (Vieten et al., 2005). Therefore, the appearance  
502 of PIN1 in the embryonic cells may be associated with the auxin biosynthesis-facilitated  
503 increase in auxin levels in these tissues.

504 In ZE, the asymmetric localization of PIN1 on the plasma membrane plays an important role in  
505 auxin gradient formation, which is instrumental in cell type specification and pattern formation.  
506 (Friml, 2010). PIN1 is expressed in the early one-cell to the 16-cell stage zygotic embryos,  
507 where it shows apolar localization. At the 32-cell stage, however, it becomes polarly localized  
508 in the provascular tissue to generate an auxin maximum that specifies the hypophyseal cell  
509 group. Later, in globular-stage embryos, PIN1 is asymmetrically localized at the plasma  
510 membrane of the upper apical region, producing auxin maxima that coincide with the formation  
511 of cotyledon primordia (Friml et al., 2003) . We did not observe clear polar localization of PIN1  
512 in early embryonic cells during SE, whereas its polar localization on the plasma membrane was  
513 detected in globular and subsequent embryo stages. This suggests that in early embryonic cells  
514 during SE, just like in early stage (one-cell to the 16-cell stage) zygotic embryos ZE, auxin is

515 not polarly transported, but rather evenly distributed over the embryonic cells. The question  
516 arises as to whether PIN1 is the only carrier that facilitates auxin efflux during SE? Other auxin  
517 transporters, such as the ATP-binding cassette (ABC) auxin efflux transporters (Geisler et al.,  
518 2017), might also contribute to auxin distribution during SE.

519 Of the four AUX/LAXs proteins that facilitate auxin influx (Swarup and Bhosale, 2019), we  
520 only detected expression of *AUX1* during SE. Therefore, we suggest that *AUX1* mediates auxin  
521 influx during SE. Co-expression of *AUX1* and *pWOX2:NLS-YFP* in embryonic cells suggests  
522 that *AUX1* and *PIN1* co-balance auxin influx and efflux in embryonic cells. Unlike NPA  
523 treatment, we found that 1-NOA treatment rapidly converted embryonic cells to non-embryonic  
524 cells. It seems that auxin influx plays a crucial role in the maintenance of embryonic cell  
525 identity. We suggest that conversion of embryonic cells into non-embryonic cells after 1-NOA  
526 treatment is related to the reduction of auxin levels in embryonic cells. We hypothesize that  
527 PIN1 or other auxin efflux carriers transport auxin to extracellular space, whereas *AUX1*  
528 prevents auxin leakage by transporting extracellular auxin back to the cytoplasm. This  
529 cooperation between auxin influx and efflux in embryonic cells establishes a balance in auxin  
530 level in embryonic cells, leading to maintenance embryonic cell identity.

531

## 532 **Conclusions**

533 Taken together, our findings uncover the importance of the endogenous auxin during distinct  
534 developmental stages of SE. We show that the acquisition of embryogenic competency and the  
535 induction of embryonic stem cells proceed independently of an increase in auxin biosynthesis,  
536 or of the auxin efflux and influx machinery. By contrast, an increase in auxin biosynthesis and  
537 auxin efflux is essential for the maintenance of embryonic cell identity (Figure 7). Development  
538 of embryonic cells into proembryos and the subsequent embryo development also requires an  
539 increase in auxin levels together with the auxin efflux and influx machinery (Figure 7). These  
540 findings can be used for the optimization of regeneration capacity via SE and for understanding  
541 the role of auxin signalling in the regulation of zygotic embryo patterning.

542



## 543 **Materials and methods**

544

### 545 **Plant material and growth conditions**

546 All *Arabidopsis thaliana* lines used in this study were in the Columbia (Col-o) background.  
547 The transgenic lines *p35S:AHL15*, *ahl15/+ pAHL15:AHL15-GUS* (Karami et al., 2021),  
548 *pDR5:GFP* (Ottenschläger et al., 2003), *pWOX2:NLS-YFP* (Breuninger et al., 2008),  
549 *pYUC1:NLS-3xGFP*, *pYUC2:GFP-GUS*, *pYUC4:NLS-3xGFP*, *pYUC5:GFP-GUS*,  
550 *pYUC6:GFP-GUS*, *pYUC7:GFP-GUS*, *pYUC8:GFP-GUS*, *pYUC9:GFP-GUS*,  
551 *pYUC10:GFP-GUS*, *pYUC11:GFP-GUS* (Robert et al., 2013), *pPIN1:PIN1-YFP* (Benkova et  
552 al., 2003) and *pAUX1:AUX1-YFP* (Swarup et al., 2005) have been described previously. Seeds  
553 were sterilized in 10 % (v/v) sodium hypochlorite for 12 minutes and then washed four times  
554 in sterile water. Sterilized seeds were plated on half MS medium (Murashige and Skoog, 1962)  
555 containing 1 % (w/v) sucrose and 0.7 % agar. Seedlings, plants, and explants were grown at  
556 21°C, 70% relative humidity and 16 hours photoperiod.

557

### 558 **Somatic embryogenesis**

559 For the isolation of IZEs at the bent cotyledon stage of development, siliques were harvested  
560 10-12 days after pollination, sterilized in 10 % (v/v) sodium hypochlorite for 7 minutes and  
561 then washed four times in sterile water. IZEs were dissected from the siliques inside a laminar  
562 flow cabinet (Gaj, 2001). In the AHL15-induced SE system, *p35S:AHL15* IZEs were cultured  
563 on solid B5 (Gamborg et al., 1968) supplemented with 2 % (w/v) sucrose and 0.7 % agar  
564 (Sigma) for 2 weeks at 21°C, 70% relative humidity and 16 hours photoperiod. Two weeks after  
565 culture, the efficiency of SE induction was scored under a stereomicroscope as the percentage  
566 of 50 *p35S:AHL15* IZE explants per plate producing somatic embryos. Four plates were scored  
567 for each experiment. In the 2,4-D-induced SE system, wild-type IZEs were cultured on solid  
568 B5 medium supplemented with 4.5 µM 2,4-D, 2 % (w/v) sucrose and 0.7 % agar (Sigma) for 2  
569 weeks. Subsequently, the embryonic structures were allowed to develop further by transferring  
570 the explants to half MS medium with 1 % (w/v) sucrose and 0.7 % agar (Sigma) without 2,4-  
571 D. One week after subculture, the capacity to induce SE was scored under a stereomicroscope  
572 as the number of somatic embryos produced from 50 IZEs per plate. Four plates were scored  
573 for each experiment.

574

575

### 576 **GUS Staining**

577 Histochemical staining of transgenic lines expressing the β-glucuronidase (GUS) reporter for  
578 GUS activity was performed as described previously (Anandalakshmi et al., 1998) for 4 hours

579 at 37 °C, followed by rehydration in a graded ethanol series (75, 50, and 25 %) for 10 minutes  
580 each.

581

### 582 **Microscopy**

583 GUS-stained tissues and cultured IZE explants were observed and photographed using a LEICA  
584 MZ12 microscopy (Switzerland) equipped with a LEICA DC500 camera.

585 Confocal Laser Scanning Microscopy (CSLM) was performed with a ZEISS-003-18533. GFP  
586 and YFP were detected using a 534 nm laser, a 488 nm LP excitation filter and a 500-525 nm  
587 band pass emission filter. Simultaneously, background fluorescence (of e.g. chlorophyll) was  
588 captured with a 650nm long pass emission filter. Images were captured with ZEISS ZEN2009  
589 software.

590

### 591 **Acknowledgements**

592 We are grateful to Helene Robert for providing the different *YUC* promoter reporter lines and  
593 to Thomas Laux for providing the *pWOX2:NLS-YFP* reporter. We thank Gerda Lamers for help  
594 with microscopy and Ward de Winter, Jan Vink and Mariel Lavrijsen for their technical  
595 support.

596 **Figures & Legends**

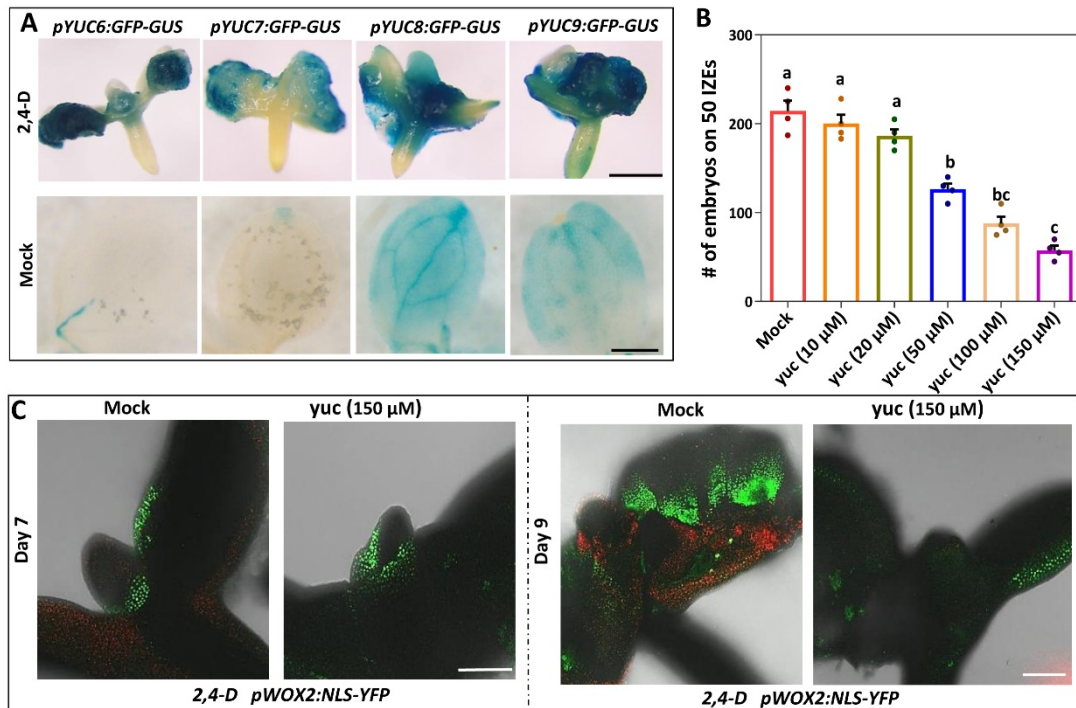

597

598 **Figure 1. IAA biosynthesis in cotyledon tissues is essential for 2,4-D induced-SE.** (A) Expression  
 599 pattern of *pYUC6:GFP-GUS*, *pYUC7:GFP-GUS*, *pYUC8:GFP-GUS*, and *pYUC9:GFP-GUS* reporters  
 600 in immature zygotic embryos (IZEs) cultured for 8 days on medium with 2,4-D (upper panel) or in  
 601 cotyledons of IZEs germinated for 8 days on medium without 2,4-D (lower panel). (B) Effect of different  
 602 concentrations of the auxin biosynthesis inhibitor yucacin (yuc) on the capacity to induce somatic  
 603 embryos on IZEs cultured on medium with 2,4-D. Dots indicate in the number somatic embryos produced  
 604 on cotyledons of 50 IZEs (n=4 biological replicates), bars indicate the mean and error bars the s.e.m..  
 605 Different letters indicate statistically significant differences (P < 0.001) as determined by a one-way  
 606 analysis of variance with Tukey's honest significant difference post hoc test. (C) Expression of  
 607 *pWOX2:NLS-YFP* in cotyledons of wild-type IZEs cultured for seven (left) and nine (right) days on 2,4-  
 608 D medium without (Mock) and with 150 μM yuc . Size bars indicate 1 mm.

609

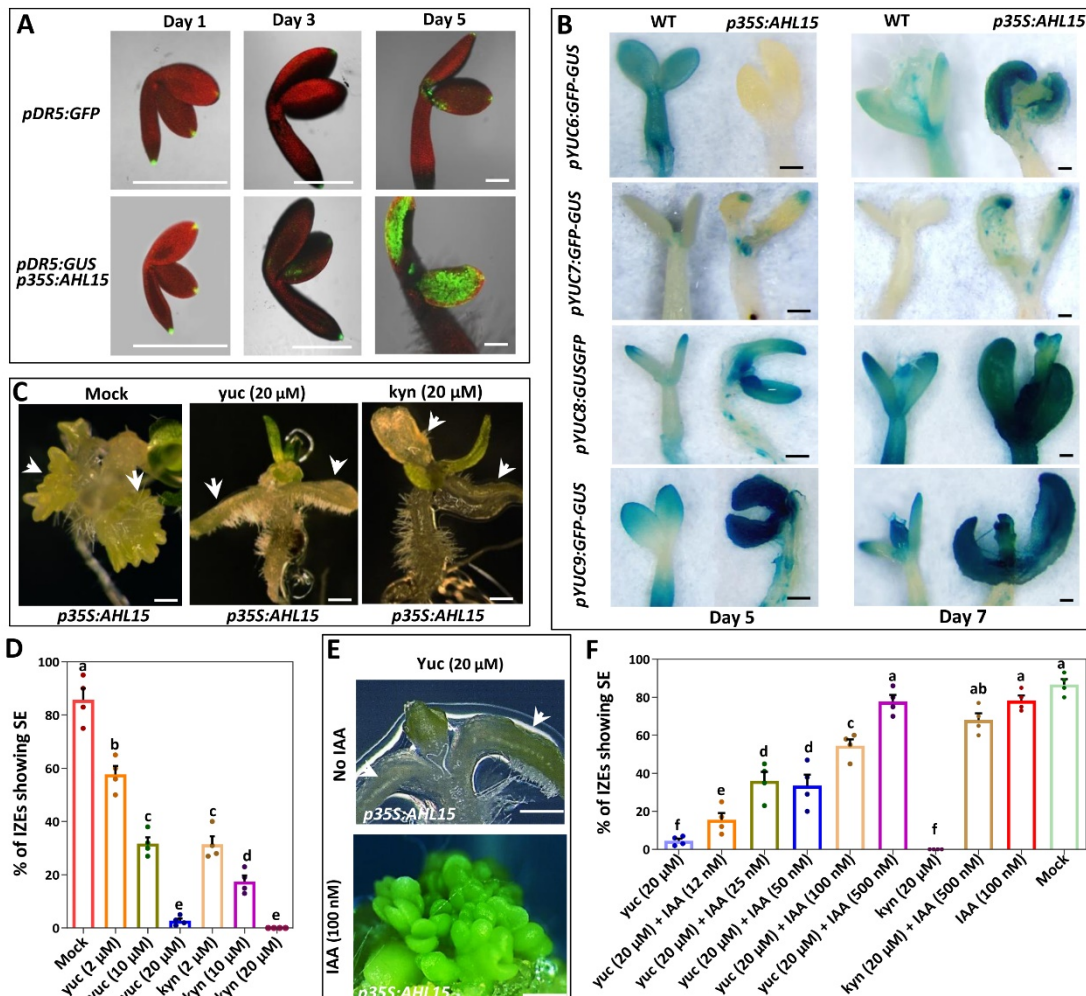

610

611 **Figure 2. IAA biosynthesis in 35S:AHL15 cotyledon tissues is essential for AHL15-induced SE.**

612 (A) Expression of the *pDR5:GFP* reporter in wild-type (upper panel) or *p35S:AHL15* (lower panel) IZEs  
613 cultured for one, three or five days on medium without 2,4-D. (B) Expression pattern of *pYUC6:GFP-*  
614 *GUS*, *pYUC7:GFP-GUS*, *pYUC8:GFP-GUS* or *pYUC9:GFP-GUS* reporters in wild-type and  
615 *35S:AHL15* IZEs cultured for five (right) or seven (left) days on medium without 2,4-D. (C) The  
616 phenotypes of *p35S:AHL15* IZEs cultured for 2 weeks on medium without 2,4-D and without (Mock) or  
617 with 20 μM of the auxin biosynthesis inhibitor *yuc* (middle) or *kyn* (left). White arrowheads indicate the  
618 adaxial side of cotyledons. (D) Effect of different concentrations of *yuc* and *kyn* on the efficiency of  
619 somatic embryo induction on cotyledons of *p35S:AHL15* IZEs. (E) The phenotypes of *p35S:AHL15* IZEs  
620 cultured for two weeks on medium without 2,4-D, but with 20 μM *yuc* and without (No IAA) or with  
621 100 nM IAA. White arrowheads indicate adaxial side of cotyledons. (F) Exogenous IAA treatment  
622 restores *yuc*- or *kyn*-impaired SE on cotyledons of *p35S:AHL15* IZEs. Dots in D and F indicate the  
623 percentage of *p35S:AHL15* IZEs producing somatic embryos (n=4 biological replicates, with 50 IZEs  
624 per replicate), bars indicate the mean, error bars the s.e.m. and different letters indicate statistically  
625 significant differences (P < 0.001) as determined by a one-way analysis of variance with Tukey's honest  
626 significant difference post hoc test. Size bars in A, B, C and E indicate 1 mm.

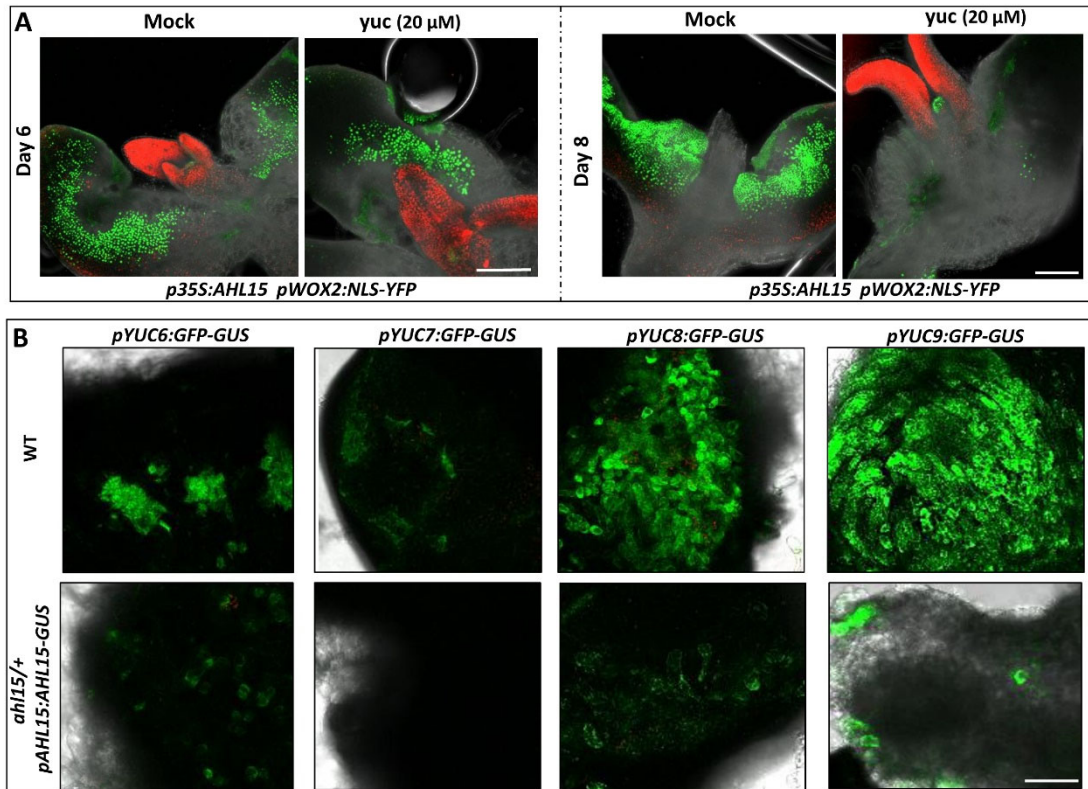

627

628 **Figure 3. YUC-mediated auxin biosynthesis is required for the maintenance of embryonic cell**

629 **identity.** (A) The expression of *pWOX2:NLS-YFP* in cotyledons of germinating *p35S:AHL15* IZEs after

630 six (left) and eight (right) days of culture on medium without (Mock) or with 20  $\mu$ M yuc. (B) Expression

631 of the *pYUC6:GFP-GUS*, *pYUC7:GFP-GUS*, *pYUC8:GFP-GUS* or *pYUC9:GFP-GUS* reporters in

632 cotyledons of wild-type (WT) or *ah15/+ pAHL15:AHL15-GUS* IZEs cultured for eight days on 2,4-D

633 medium. Size bars indicate 0.5 mm.

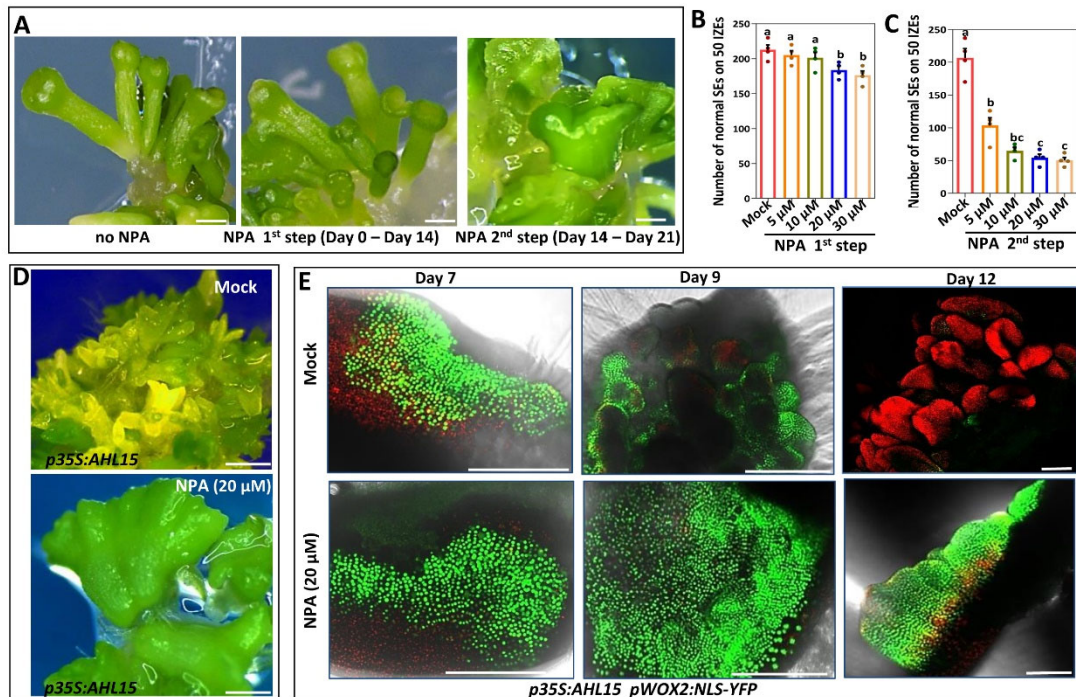

634

635 **Figure 4. Auxin efflux is required for the proper development of embryonic cells into somatic**  
 636 **embryos.** (A) The phenotype of somatic embryos formed on cotyledons of wild-type IZEs that were first  
 637 grown for two weeks on 2,4-D medium and subsequently cultured for 1 week on medium without 2,4-D  
 638 (left), or with 20 μM NPA (middle) or first on 2,4-D medium with 20 μM NPA and subsequently cultured  
 639 on medium without 2,4-D and NPA (right). (B) The number of non-fused somatic embryos (normal SEs)  
 640 per 50 IZEs that were first grown for two weeks on 2,4-D medium without (Mock) and with different  
 641 concentrations of NPA, and subsequently grown for 1 week on medium without 2,4-D or NPA. (C) The  
 642 number of non-fused somatic embryos (normal SEs) per 50 IZEs that were first grown for 2 weeks on  
 643 2,4-D medium and subsequently grown for 1 week on medium without 2,4-D and with different  
 644 concentrations of NPA. The dots in B and C indicate the number of normal somatic embryos produced  
 645 per 50 IZEs (n=4 biological replicates), bars indicate the mean and error bars indicate s.e.m.. Different  
 646 letters indicate statistically significant differences ( $P < 0.001$ ) as determined by one-way analysis of  
 647 variance with Tukey's honest significant difference post hoc test. (D) The phenotypes of somatic  
 648 embryos formed on cotyledons of a two week-old *p35S:AHL15* IZE on B5 medium supplemented with  
 649 20 μM NPA (right) and without NPA (left). (E) The expression pattern of *pWOX2:NLS-YFP* in cotyledon  
 650 tissues of *p35S:AHL15* IZEs after seven, nine, or twelve days of culture on medium without NPA (upper  
 651 images) or on medium supplemented with 20 μM NPA (lower images). Size bars indicate 1 mm in A, B,  
 652 D, and E, or 0.5 mm in E.

653

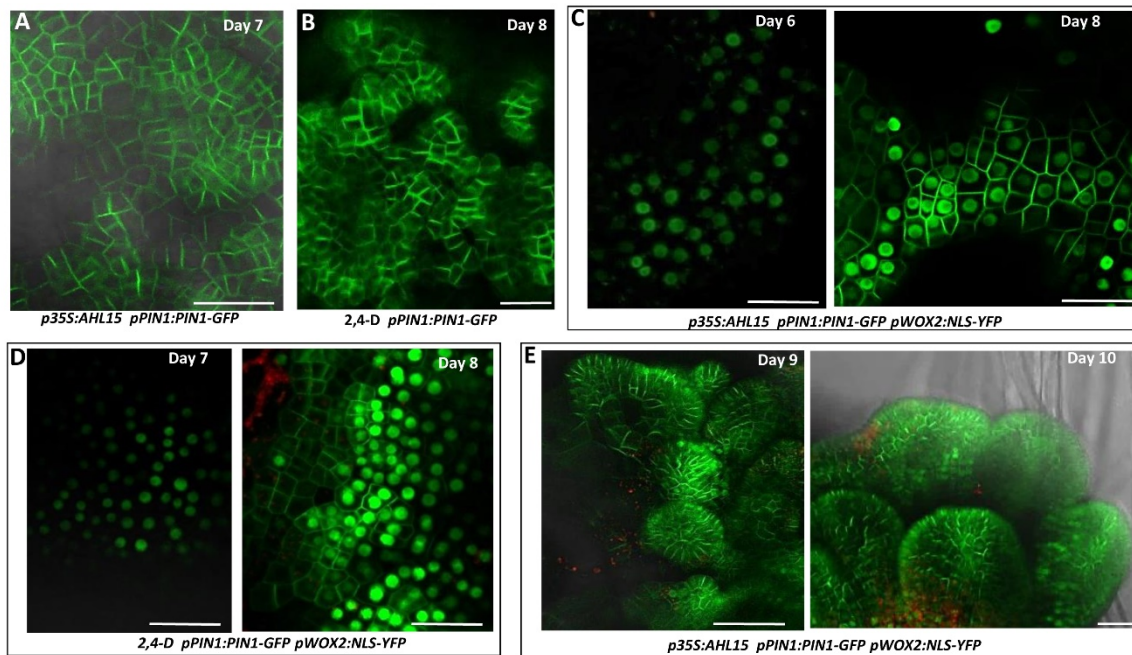

654

655 **Figure 5. Expression and localization of *PIN1* during AHL15- and 2,4-D-induced SE.** (A, B) PIN1-

656 GFP signals detected in cotyledons of *p35S:AHL15* IZEs after seven days of culture on medium (A) or

657 in cotyledons of wild-type IZEs after eight days of culture on medium supplemented with 5 μM 2,4-D

658 (B). (C) Expression of *pPIN1:PIN1-GFP* (plasma membrane) and *pWOX2:NLS-YFP* (nucleus) in

659 cotyledon tissues of *p35S:AHL15* IZEs after six (left) or eight (right) days of culture. (D) Expression of

660 *pPIN1:PIN1-GFP* and *pWOX2:NLS-YFP* in cotyledon tissues of wild-type IZEs after seven (left) or eight

661 (right) days of culture on medium supplemented with 5 μM 2,4-D. Note that in C (left) and D (left) the

662 cotyledon cells show a clear nuclear YFP signal, whereas no PIN1-GFP is yet detectable. (E) Expression

663 of *pPIN1:PIN1-GFP* and *pWOX2:NLS-YFP* in globular (left) and heart (right) stage embryos developing

664 on cotyledons of *p35S:AHL15* IZEs cultured for respectively nine or ten days. Size bars indicate 100 μm.

665

666

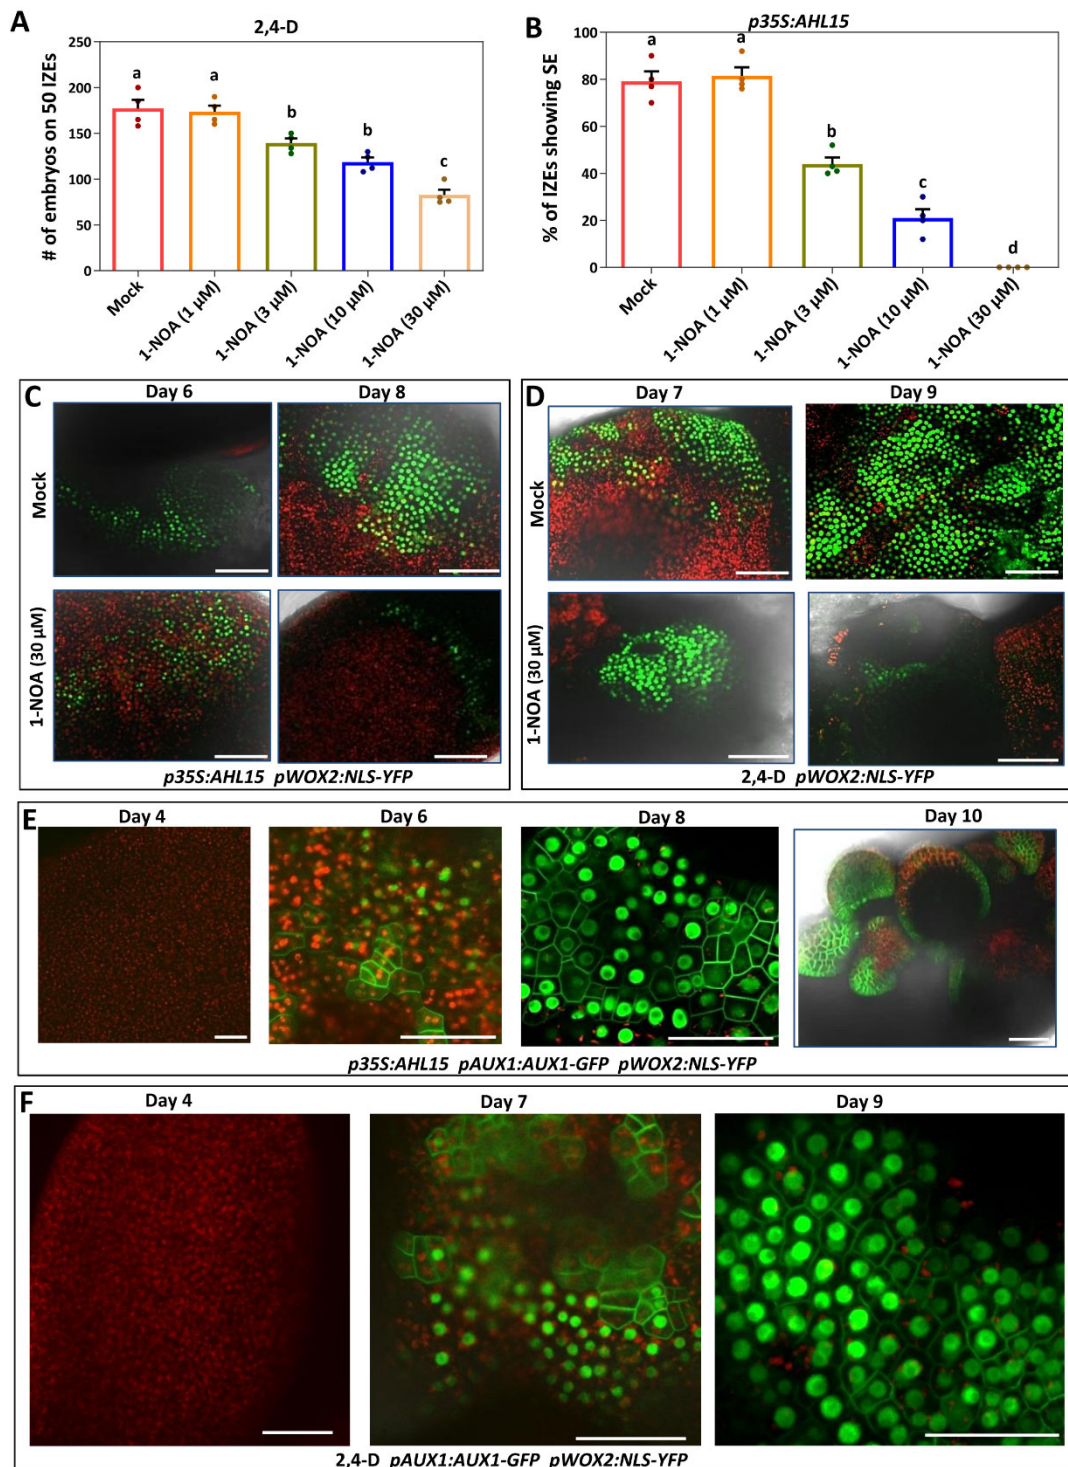

667

668 **Figure 6. AUX1-mediated auxin influx is required for embryonic cell identity maintenance during**

669 **SE. (A)** Number of somatic embryos per 50 wild-type IZEs that were first grown for two weeks on 2,4-

670 **D** medium with different concentrations of 1-NOA, and subsequently grown for 1 week on medium

671 without 2,4-D (n=4 biological replicates, with 50 IZEs per replicate) **(B)** Efficiency of embryo induction

672 (% of 50 IZEs forming somatic embryos) on cotyledons of *p35S:AHL15* IZEs on medium with different

673 concentrations of 1-NOA. Dots in **A** and **B** indicate the number or percentage, horizontal lines indicate

674 the mean and error bars indicate s.e.m. and different letters indicate statistically significant differences

675 ( $P < 0.001$ ) as determined by one-way analysis of variance with Tukey's honest significant difference



676 post hoc test. (C) The expression pattern of *pWOX2:NLS-YFP* in cotyledons *p35S:AHL15* IZEs after six  
677 or eight days of culture on medium without (up) or with 30  $\mu$ M 1-NOA (down). (D) The expression  
678 pattern of *pWOX2:NLS-YFP* in cotyledons of wild type IZEs after six or nine days of culture on medium  
679 with 2,4-D only (up) or with 2,4-D and 30  $\mu$ M 1-NOA (down). (E) The expression patterns of  
680 *pAUX1:AUX1-GFP* and *pWOX2:NLS-YFP* in cotyledons of *p35S:AHL15* IZEs after four-, six- or eight  
681 days of culture or in globular to heart stage somatic embryos formed after ten days of culture. (F) The  
682 expression patterns of *pAUX1:AUX1-GFP* and *pWOX2:NLS-YFP* in cotyledons of wild-type IZEs after  
683 four, seven or nine days of culture on medium with 2,4-D. Size bars indicate 100  $\mu$ m.  
684  
685

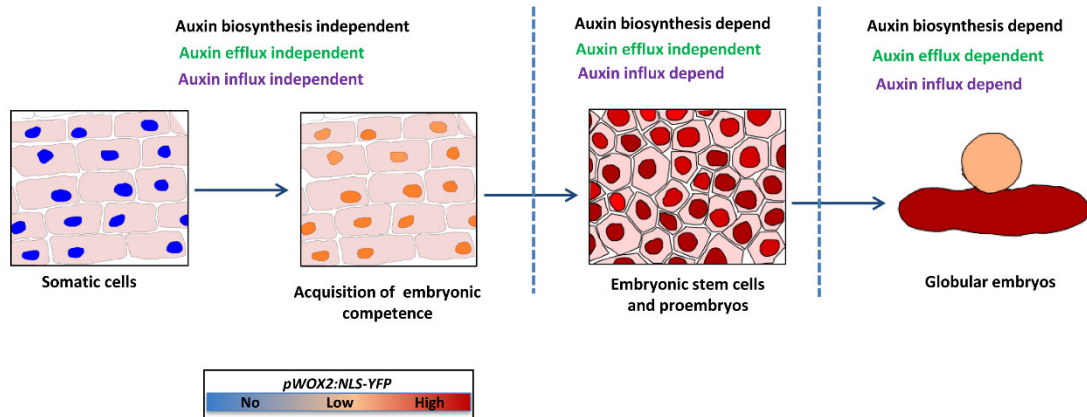

686

687 **Figure 7. Model for the role of endogenous auxin during different stages of SE.** The schematic  
688 diagram presents four distinct developmental stages of somatic embryo induction on cotyledons of  
689 Arabidopsis IZEs, as distinguished by the *pWOX2:NLS-YFP* embryonic cell identity reporter. The  
690 reporter is not expressed in somatic cells. Low expression marks the acquisition of embryogenic  
691 competence, which occurs independent of endogenous auxin biosynthesis or transport. The occurrence  
692 and maintenance of embryonic stem cells that form proembryos coincides with an increase in  
693 *pWOX2:NLS-YFP* expression and requires auxin biosynthesis and auxin influx. The subsequent  
694 development of these proembryos into globular embryos and further embryo development leads to loss  
695 of *pWOX2:NLS-YFP* expression and is dependent on auxin biosynthesis and transport by the auxin efflux  
696 and influx machinery.

697

698 **References**

- 699  
700 **Adamowski M, Friml J** (2015) PIN-dependent auxin transport: Action, regulation, and evolution. *Plant Cell* **27**:  
701 20–32  
702 **Anandalakshmi, R., Pruss, G. J., Ge, X., Marathe, R., Mallory, A. C., Smith, T. H., and Vance VB** (1998) A  
703 viral suppressor of gene silencing in plants. *Proc Natl Acad Sci* **95**: 13079–13084  
704 **Awada R, Campa C, Gibault E, Déchamp E, Georget F, Lepelley M, Abdallah C, Erban A, Martinez-Seidel**  
705 **F, Kopka J, et al** (2019) Unravelling the metabolic and hormonal machinery during key steps of somatic  
706 embryogenesis: A case study in coffee. *Int J Mol Sci*. doi: 10.3390/ijms20194665  
707 **Bai B, Su YH, Yuan J, Zhang XS** (2013) Induction of somatic embryos in Arabidopsis requires local YUCCA  
708 expression mediated by the down-regulation of ethylene biosynthesis. *Mol Plant* **6**: 1247–1260  
709 **Bainbridge K, Guyomarc’h S, Bayer E, Swarup R, Bennett M, Mandel T, Kuhlemeier C** (2008) Auxin influx  
710 carriers stabilize phyllotactic patterning. *Genes Dev* **22**: 810–823  
711 **Benkova E, Michniewicz M, Sauer M, Teichmann T, Pflanz M, Jürgens G** (2003) Local, efflux-dependent auxin  
712 gradients as a common module for plant organ formation. *Cell* **115**: 591–602  
713 **Birnbaum KD, Sánchez Alvarado A** (2008) Slicing across kingdoms: regeneration in plants and animals. *Cell*  
714 **132**: 697–710  
715 **Boot KJM, Hille SC, Libbenga KR, Peletier LA, Van Spronsen PC, Van Duijn B, Offringa R** (2016)  
716 Modelling the dynamics of polar auxin transport in inflorescence stems of Arabidopsis thaliana. *J Exp Bot*  
717 **67**: 649–666  
718 **Boutlier K, Offringa R, Sharma VK, Kieft H, Ouellet T, Zhang L, Hattori J, Liu C, van Lammeren AAM,**  
719 **Miki BLA, et al** (2002) Ectopic expression of BABY BOOM triggers a conversion from vegetative to  
720 embryonic growth. *Plant Cell* **14**: 1737–1749  
721 **Breuninger H, Rikirsch E, Hermann M, Ueda M, Laux T** (2008) Differential expression of WOX genes  
722 mediates apical-basal axis formation in the Arabidopsis embryo. *Dev Cell* **14**: 867–876  
723 **Chen Q, Dai X, De-Paoli H, Cheng Y, Takebayashi Y, Kasahara H, Kamiya Y, Zhao Y** (2014) Auxin  
724 overproduction in shoots cannot rescue auxin deficiencies in Arabidopsis roots. *Plant Cell Physiol* **55**:  
725 1072–10729  
726 **Chen X, Hartman A, Guo S** (2015) Choosing cell fate through a dynamic cell cycle. *Curr Stem Cell Reports* **1**:  
727 129–138  
728 **Cheng WH, Zhu HG, Tian WG, Zhu SH, Xiong XP, Sun YQ, Zhu QH, Sun J** (2016) De novo transcriptome  
729 analysis reveals insights into dynamic homeostasis regulation of somatic embryogenesis in upland cotton  
730 (*G. hirsutum L.*). *Plant Mol Biol* **92**: 279–292  
731 **Cheng Y, Dai X, Zhao Y** (2006) Auxin biosynthesis by the YUCCA flavin monooxygenases controls the  
732 formation of floral organs and vascular tissues in Arabidopsis. *Genes Dev* **20**: 1790–1799  
733 **Cheng Y, Dai X, Zhao Y** (2007) Auxin synthesized by the YUCCA flavin monooxygenases is essential for  
734 embryogenesis and leaf formation in Arabidopsis. *Plant Cell* **19**: 2430–2439  
735 **Eyer L, Vain T, Pařízková B, Oklestkova J, Barbez E, Kozubíková H, Pospíšil T, Wierzbicka R, Kleine-**  
736 **Vehn J, Fránek M, et al** (2016) 2,4-D and IAA amino acid conjugates show distinct metabolism in  
737 Arabidopsis. *PLoS One* **11**: 1–18  
738 **Friml J** (2010) Subcellular trafficking of PIN auxin efflux carriers in auxin transport. *Eur J Cell Biol* **89**: 231–235  
739 **Friml J, Vieten A, Sauer M, Weijers D, Schwarz H, Hamann T, Offringa R, Jürgens G** (2003) Efflux-  
740 dependent auxin gradients establish the apical-basal axis of Arabidopsis. *Nature* **426**: 147–153  
741 **Gaj MD** (2011) Somatic embryogenesis and plant regeneration in the culture of Arabidopsis thaliana (L.) Heynh.  
742 immature zygotic embryos. *Methods Mol Biol* **710**: 257–265  
743 **Gaj MD** (2001) Direct somatic embryogenesis as a rapid and efficient system for in vitro regeneration of  
744 Arabidopsis thaliana. *Plant Cell Tissue Organ Cult* **64**: 39–46  
745 **Gamborg OL, Miller RA, Ojima K** (1968) Nutrient requirements of suspension cultures of soybean root cells.  
746 *Exp Cell Res* **50**: 151–158  
747 **Geisler M, Aryal B, Di Donato M, Hao P** (2017) A critical view on ABC transporters and their interacting  
748 partners in auxin transport. *Plant Cell Physiol* **58**: 1601–1604  
749 **Guan Y, Li SG, Fan XF, Su ZH** (2016) Application of somatic embryogenesis in woody plants. *Front Plant Sci*  
750 **7**: 1–12  
751 **Habets MEJ, Offringa R** (2014) PIN-driven polar auxin transport in plant developmental plasticity: A key target  
752 for environmental and endogenous signals. *New Phytol* **203**: 362–377  
753 **Hand ML, Koltunow AMG** (2014) The genetic control of apomixis: asexual seed formation. *Genetics* **197**: 441–  
754 450  
755 **He W, Brumos J, Li H, Ji Y, Ke M, Gong X, Zeng Q, Li W, Zhang X, An F, et al** (2011) A small-molecule  
756 screen identifies L-Kynurenine as a competitive inhibitor of TAA1/TAR activity in Ethylene-Directed  
757 Auxin Biosynthesis and root growth in Arabidopsis. *Plant Cell* **23**: 3944–3960  
758 **Heidstra R, Sabatini S** (2014) Plant and animal stem cells: similar yet different. *Nat Rev Mol Cell Biol* **15**: 301–  
759 312  
760 **Hentrich M, Böttcher C, Düchting P, Cheng Y, Zhao Y, Berkowitz O, Masle J, Medina J, Pollmann S** (2013)  
761 The jasmonic acid signaling pathway is linked to auxin homeostasis through the modulation of *YUCCA8*  
762 and *YUCCA9* gene expression. *Plant J* **74**: 626–637  
763 **Horstman A, Li M, Heidmann I, Weemen M, Chen B, Muino JM, Angenent GC, Boutiliera K** (2017) The  
764 BABY BOOM transcription factor activates the *LEC1-ABI3-FUS3-LEC2* network to induce somatic  
765 embryogenesis. *Plant Physiol* **175**: 848–857

- 766 **Ikeda-Iwai M** (2002) Establishment of a reproducible tissue culture system for the induction of Arabidopsis  
767 somatic embryos. *J Exp Bot* **53**: 1575–1580
- 768 **Ivanova A, Velcheva M, Denchev P, Atanassov A, Van Onckelen HA** (1994) Endogenous hormone levels  
769 during direct somatic embryogenesis in *Medicago falcata*. *Physiol Plant* **92**: 85–89
- 770 **Jiménez VM, Bangerth F** (2001a) Endogenous hormone concentrations and embryogenic callus development in  
771 wheat. *Plant Cell Tissue Organ Cult* **67**: 37–46
- 772 **Jiménez VM, Bangerth F** (2001b) Hormonal status of maize initial explants and of the embryogenic and non-  
773 embryogenic callus cultures derived from them as related to morphogenesis in vitro. *Plant Sci* **160**: 247–257
- 774 **Karami O, Rahimi A, Mak P, Horstman A, Boutilier K, Compier M, Van der Zaal B, Offringa R** (2021) An  
775 Arabidopsis AT-hook motif nuclear protein mediates somatic-to-embryonic cell fate conversion coinciding  
776 with genome duplication. *Nat Commun* **12**: 1–13
- 777 **Kasahara H** (2016) Current aspects of auxin biosynthesis in plants. *Biosci Biotechnol Biochem* **80**: 34–42
- 778 **Kim JI, Murphy AS, Baek D, Lee S-W, Yun D-J, Bressan R a, Narasimhan ML** (2011) *YUCCA6* over-  
779 expression demonstrates auxin function in delaying leaf senescence in *Arabidopsis thaliana*. *J Exp Bot* **62**:  
780 3981–392
- 781 **Korasick D a, Enders T a, Strader LC** (2013) Auxin biosynthesis and storage forms. *J Exp Bot* **64**: 2541–2555
- 782 **Lau S, Slane D, Herud O, Kong J, Jürgens G** (2012) Early embryogenesis in flowering plants: setting up the  
783 basic body pattern. *Annu Rev Plant Biol* **63**: 483–506
- 784 **Leljak-Levanić D, Mihaljević S, Bauer N** (2015) Somatic and zygotic embryos share common developmental  
785 features at the onset of plant embryogenesis. *Acta Physiol Plant* **37**: 127
- 786 **Lotan T, Ohto M, Yee KM, West M a, Lo R, Kwong RW, Yamagishi K, Fischer RL, Goldberg RB, Harada  
787 JJ** (1998) Arabidopsis LEAFY COTYLEDON1 is sufficient to induce embryo development in vegetative  
788 cells. *Cell* **93**: 1195–1205
- 789 **Ma Q, Grones P, Robert S** (2018) Auxin signaling: A big question to be addressed by small molecules. *J Exp Bot*  
790 **69**: 313–328
- 791 **Márquez-López RE, Pérez-Hernández C, Ku-González Á, Galaz-Ávalos RM, Loyola-Vargas VM** (2018)  
792 Localization and transport of indole-3-acetic acid during somatic embryogenesis in *Coffea canephora*.  
793 *Protoplasma* **255**: 695–708
- 794 **Michalczuk L, Druart P** (1999) Indole-3-acetic acid metabolism in hormone-autotrophic, embryogenic callus of  
795 Inmil® cherry rootstock (*Prunus incisa* x *serrula* ‘GM 9’) and in hormone-dependent, nonembryogenic calli  
796 of *Prunus incisa* x *serrula* and *Prunus domestica*. *Physiol Plant* **107**: 426–432
- 797 **Möller B, Weijers D** (2009) Auxin control of embryo patterning. *Cold Spring Harb Perspect Biol* **1**: 1–13
- 798 **Möller BK, Ten Hove CA, Xiang D, Williams N, López LG, Yoshida S, Smit M, Datla R, Weijers D** (2017)  
799 Auxin response cell-autonomously controls ground tissue initiation in the early Arabidopsis embryo. *Proc*  
800 *Natl Acad Sci U S A* **114**: E2533–E2539
- 801 **Murashige T, Skoog F** (1962) A revised medium for rapid growth and bio assays with tobacco tissue cultures.  
802 *Physiol Plant* **15**: 473–497
- 803 **Nishimura T, Hayashi K-I, Suzuki H, Gyohda A, Takaoka C, Sakaguchi Y, Matsumoto S, Kasahara H,  
804 Sakai T, Kato J-I, et al** (2014) Yucasin is a potent inhibitor of YUCCA, a key enzyme in auxin  
805 biosynthesis. *Plant J* **77**: 352–366
- 806 **Ottenschläger I, Wolff P, Wolverton C, Bhalerao RP, Sandberg G, Ishikawa H, Evans M, Palme K** (2003)  
807 Gravity-regulated differential auxin transport from columella to lateral root cap cells. *Proc Natl Acad Sci U*  
808 *S A* **100**: 2987–2991
- 809 **Ozias-Akins P** (2006) Apomixis: developmental characteristics and genetics. *CRC Crit Rev Plant Sci* **25**: 199–214
- 810 **Paque S, Weijers D** (2016) Q&A: Auxin: The plant molecule that influences almost anything. *BMC Biol* **14**: 1–5
- 811 **Parry G, Delbarre A, Marchant A, Swarup R, Napier R, Perrot-rechenmann C, Bennett MJ** (2001) Novel  
812 auxin transport inhibitors phenocopy the auxin influx carrier mutation aux1. *Plant J* **25**: 399–406
- 813 **Péret B, Swarup K, Ferguson A, Seth M, Yang Y, Dhondt S, James N, Casimiro I, Perry P, Syed A, et al**  
814 (2012) *AUX/LAX* genes encode a family of auxin influx transporters that perform distinct functions during  
815 Arabidopsis development. *Plant Cell* **24**: 2874–2885
- 816 **Pillot M, Baroux C, Vazquez MA, Autran D, Leblanc O, Vielle-Calzada JP, Grossniklaus U, Grimanelli D**  
817 (2010) Embryo and endosperm inherit distinct chromatin and transcriptional states from the female gametes  
818 in Arabidopsis. *Plant Cell* **22**: 307–320
- 819 **Robert HS, Grones P, Stepanova AN, Robles LM, Lokerse AS, Alonso JM, Weijers D, Friml J** (2013) Local  
820 auxin sources orient the apical-basal axis in Arabidopsis embryos. *Curr Biol* **23**: 2506–2512
- 821 **Robert HS, Grunewald W, Sauer M, Cannoot B, Soriano M, Swarup R, Weijers D, Bennett M, Boutilier K,  
822 Friml J** (2015) Plant embryogenesis requires aux/lax-mediated auxin influx. *Dev*. doi: 10.1242/dev.115832
- 823 **Robert HS, Park C, Gutiérrez CL, Wójcikowska B, Pěňčík A, Novák O, Chen J, Grunewald W, Dresselhaus  
824 T, Friml J, et al** (2018) Maternal auxin supply contributes to early embryo patterning in Arabidopsis. *Nat*  
825 *Plants* **4**: 548–553
- 826 **She W, Baroux C** (2014) Chromatin dynamics during plant sexual reproduction. *Front Plant Sci* **5**: 354
- 827 **Stepanova AN, Robertson-Hoyt J, Yun J, Benavente LM, Xie D-Y, Dolezal K, Schlereth A, Jürgens G,  
828 Alonso JM** (2008) TAA1-mediated auxin biosynthesis is essential for hormone crosstalk and plant  
829 development. *Cell* **133**: 177–191
- 830 **Stone SL, Braybrook SA, Paula SL, Kwong LW, Meuser J, Pelletier J, Hsieh TF, Fischer RL, Goldberg RB,  
831 Harada JJ** (2008) Arabidopsis LEAFY COTYLEDON2 induces maturation traits and auxin activity:  
832 Implications for somatic embryogenesis. *Proc Natl Acad Sci U S A* **105**: 3151–3156
- 833 **Stone SL, Kwong LW, Yee KM, Pelletier J, Lepiniec L, Fischer RL, Goldberg RB, Harada JJ** (2001)

- 834 LEAFY COTYLEDON2 encodes a B3 domain transcription factor that induces embryo development. Proc  
835 Natl Acad Sci **98**: 11806–11811
- 836 **Swarup R, Bhosale R** (2019) Developmental roles of AUX1/LAX auxin influx carriers in plants. Front Plant Sci  
837 **10**: 1–14
- 838 **Swarup R, Kramer EM, Perry P, Knox K, Leyser HMO, Haseloff J, Beemster GTS, Bhalerao R, Bennett  
839 MJ** (2005) Root gravitropism requires lateral root cap and epidermal cells for transport and response to a  
840 mobile auxin signal. Nat Cell Biol **7**: 1057–1065
- 841 **Takatsuka H, Umeda M** (2014) Hormonal control of cell division and elongation along differentiation  
842 trajectories in roots. J Exp Bot **65**: 2633–2643
- 843 **Tivendale ND, Ross JJ, Cohen JD** (2014) The shifting paradigms of auxin biosynthesis. Trends Plant Sci **19**: 44–  
844 51
- 845 **Ugaratechea-Chirino Y, Swarup R, Swarup K, Péret B, Whitworth M, Bennett M, Bougourd S** (2010) The  
846 AUX1 LAX family of auxin influx carriers is required for the establishment of embryonic root cell  
847 organization in Arabidopsis thaliana. Ann Bot **105**: 277–289
- 848 **Vanneste S, Friml J** (2009) Auxin: a trigger for change in plant development. Cell **136**: 1005–1016
- 849 **Vieten A, Vanneste S, Wisniewska J, Benková E, Benjamins R, Beeckman T, Luschnig C, Friml J** (2005)  
850 Functional redundancy of PIN proteins is accompanied by auxin-dependent cross-regulation of PIN  
851 expression. Development **132**: 4521–4531
- 852 **Vondrakova Z, Dobrev PI, Pesek B, Fischerova L, Vagner M, Motyka V** (2018) Profiles of endogenous  
853 phytohormones over the course of norway spruce somatic embryogenesis. Front Plant Sci **9**: 1–13
- 854 **Wang B, Zhang Z, Yin Z, Feng C, Wang Q** (2012) Novel and potential application of cryopreservation to plant  
855 genetic transformation. Biotechnol Adv **30**: 604–612
- 856 **Wang FX, Shang GD, Wu LY, Xu ZG, Zhao XY, Wang JW** (2020) Chromatin accessibility dynamics and a  
857 hierarchical transcriptional regulatory network structure for plant somatic embryogenesis. Dev Cell **54**: 742-  
858 757.e8
- 859 **Weijers D, Sauer M, Meurette O, Friml J, Ljung K, Sandberg G, Hooykaas P, Offringa R** (2005)  
860 Maintenance of embryonic auxin distribution for apical-basal patterning by PIN-FORMED-dependent auxin  
861 transport in Arabidopsis. Plant Cell **17**: 2517–2526
- 862 **Wickramasuriya AM, Dunwell JM** (2015) Global scale transcriptome analysis of Arabidopsis embryogenesis in  
863 vitro. BMC Genomics **16**: 301
- 864 **Wójcik AM, Wójcikowska B, Gaj MD** (2020) Current perspectives on the auxin-mediated genetic network that  
865 controls the induction of somatic embryogenesis in plants. Int J Mol Sci **21**: 1–19
- 866 **Wójcikowska B, Jaskóla K, Gąsiorek P, Meus M, Nowak K, Gaj MD** (2013) LEAFY COTYLEDON2 (LEC2)  
867 promotes embryogenic induction in somatic tissues of Arabidopsis, via YUCCA-mediated auxin  
868 biosynthesis. Planta **238**: 425–440
- 869 **Zhao Y** (2018) Essential roles of local auxin biosynthesis in plant development and in adaptation to environmental  
870 changes. Annu Rev Plant Biol **69**: 417–435
- 871 **Zhao Y, Christensen SK, Fankhauser C, Cashman JR, Cohen JD, Weigel D, Chory J** (2001) A role for flavin  
872 monooxygenase-like enzymes in auxin biosynthesis. Science **291**: 306–309
- 873 **Zuo J, Niu Q-W, Frugis G, Chua N-H** (2002) The *WUSCHEL* gene promotes vegetative-to-embryonic transition  
874 in Arabidopsis. Plant J **30**: 349–359
- 875
